# Supplementary material
Source: HighWire-hosted journal article supplement (http://d2538ggaoe6cji.cloudfront.net/highwire/filestream/55940/field_highwire_adjunct_files/1/127936-2.pdf)
Supplement: 127936-2.pdf [file 127936-2.pdf]

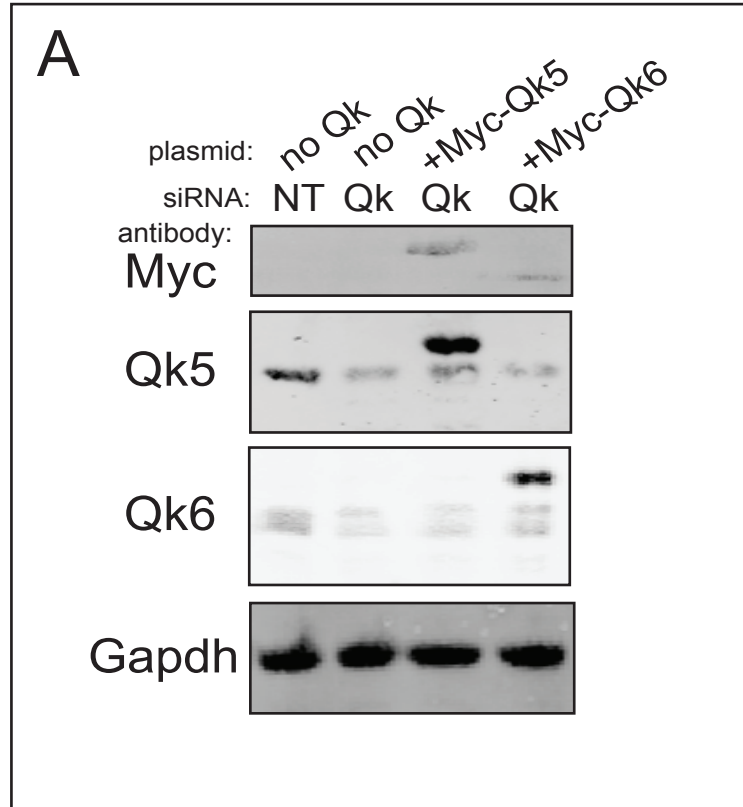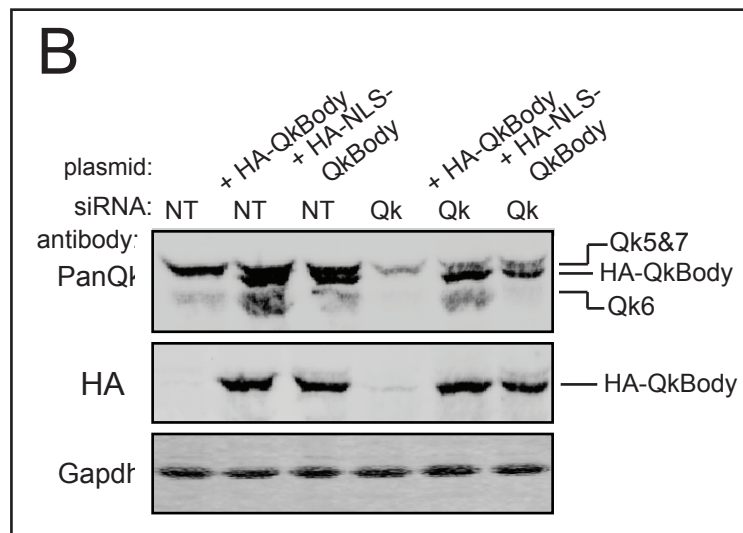

Figure S2 (supplemental to Figure 2): A. Representative western blot of whole cell extracts prepared from C2C12 myoblasts transfected as described in Fig 2B and 2C with control siRNA (siNT), or siRNA targeting all Qk isoforms (siQk), siQk plus Myc-Qk5, and siQk plus Myc-Qk6 Myc epitope antibody (top), Qk5 antibody (second from top), Qk6 antibody (second from bottom), and Gapdh antibody (bottom). B. Representative western blot of protein lysates from C2C12 myoblast transfections described in Fig 2E and 2F: top shows membrane probed with PanQk antibody (observed migration pattern of endogenous and mutant proteins shown at right), middle probed with HA epitope antibody, and bottom probed with Gapdh antibody.
